# Supplementary material for: The impact of stroke nurse specialist input on risk factor modification: a randomised controlled trial
Source: Oxford University Press journal article supplement (doi:10.1093/ageing/afi075), 2005-06-14
Supplement: afi075_Supplementary_Data.zip [file afi075_Supplementary_Data.zip]

Archive with 2 entries (2 files):
- afi075supplapp1.pdf
- afi075supplapp2.pdf
