# Supplementary material for: The impact of stroke nurse specialist input on risk factor modification: a randomised controlled trial
Source: Oxford University Press journal article supplement (doi:10.1093/ageing/afi075), 2005-06-14
Supplement: afi075_Supplementary_Data.zip [file afi075_Supplementary_Data.zip › afi075supplapp2.pdf]

Table 3

## Satisfaction with Stroke Services

(Experiment n=94, Control n=98)

| Question                                                                                         | Randomisation | Strongly Agree | Agree      | Disagree   | Strongly Disagree | p Value |
|--------------------------------------------------------------------------------------------------|---------------|----------------|------------|------------|-------------------|---------|
| I have been treated with kindness and respect by staff at the hospital.                          | experiment    | 79 (84%)       | 14 (14.9%) | 1 (1.1%)   |                   | 0.25    |
|                                                                                                  | control       | 76 (77.6%)     | 22 (22.4%) |            |                   |         |
| The staff attended well to my needs when I was at the hospital.                                  | experiment    | 73 (77.7%)     | 19 (20.2%) | 2 (2.1%)   |                   | 0.26    |
|                                                                                                  | control       | 73 (74.5%)     | 25 (25.5%) |            |                   |         |
| I was able to talk to the staff about any problems I might have had.                             | experiment    | 70 (74.5%)     | 19 (20.2%) | 5 (5.3%)   |                   | 0.027   |
|                                                                                                  | control       | 56 (57.1%)     | 37 (37.8%) | 5 (5.1%)   |                   |         |
| I have received all the information I want about the causes and nature of my illness.            | experiment    | 66 (70.2%)     | 21 (22.3%) | 7 (7.4%)   |                   | 0.022   |
|                                                                                                  | control       | 50 (51.0%)     | 41 (41.8%) | 6 (6.1%)   | 1 (1.0%)          |         |
| The doctors have done everything they can to make me well again.                                 | experiment    | 71 (75.5%)     | 22 (23.4%) | 1 (1.1%)   |                   | 0.36    |
|                                                                                                  | control       | 65 (66.3%)     | 31 (31.6%) | 2 (2.0%)   |                   |         |
| I am satisfied with the outpatient services provided by the hospital.                            | experiment    | 70 (74.5%)     | 19 (20.2%) | 4 (4.3%)   | 1 (1.1%)          | 0.08    |
|                                                                                                  | control       | 64 (65.3%)     | 33 (33.7%) | 1 (1.0%)   |                   |         |
| I have received enough information about my risk factors for stroke.                             | experiment    | 67 (72.0%)     | 18 (19.4%) | 8 (8.6%)   |                   | 0.010   |
|                                                                                                  | control       | 53 (54.6%)     | 36 (37.1%) | 5 (5.2%)   | 3 (3.1%)          |         |
| Somebody has really listened and understood my needs and problems since I attended the hospital. | experiment    | 64 (68.1%)     | 23 (24.5%) | 7 (7.4%)   |                   | 0.21    |
|                                                                                                  | control       | 59 (60.8%)     | 34 (35.1%) | 4 (4.1%)   |                   |         |
| I am satisfied with the amount of contact I have had with the hospital since I have attended.    | experiment    | 69 (73.4%)     | 23 (24.5%) | 2 (2.1%)   |                   | 0.17    |
|                                                                                                  | control       | 61 (62.2%)     | 31 (31.6%) | 6 (6.1%)   |                   |         |
| I have had enough emotional support since I attended the hospital.                               | experiment    | 56 (59.6%)     | 34 (36.2%) | 4 (4.3%)   |                   | 0.23    |
|                                                                                                  | control       | 47 (48.0%)     | 41 (41.8%) | 9 (9.2%)   | 1 (1.0%)          |         |
| I know whom to contact if I have problems relating to my TIA/stroke.                             | experiment    | 67 (71.3%)     | 20 (21.3%) | 7 (7.4%)   |                   | 0.034   |
|                                                                                                  | control       | 51 (52.0%)     | 32 (32.7%) | 13 (13.3%) | 2 (2.0%)          |         |
| I am happy with the amount of recovery I have made.                                              | experiment    | 55 (58.5%)     | 28 (29.8%) | 10 (10.6%) | 1 (1.1%)          | 0.93    |
|                                                                                                  | control       | 54 (55.1%)     | 31 (31.6%) | 11 (11.2%) | 2 (2.0%)          |         |
| I was given all the information I needed about the allowances or services I might need.          | experiment    | 50 (54.9%)     | 27 (29.7%) | 12 (13.2%) | 2 (2.2%)          | 0.44    |
|                                                                                                  | control       | 43 (45.7%)     | 38 (40.4%) | 10 (10.6%) | 3 (3.2%)          |         |
