# Supplementary figures and images for: The impact of stroke nurse specialist input on risk factor modification: a randomised controlled trial
Source: Oxford University Press journal article supplement (doi:10.1093/ageing/afi075), 2005-06-14

Figure 1

**Trial Profile**

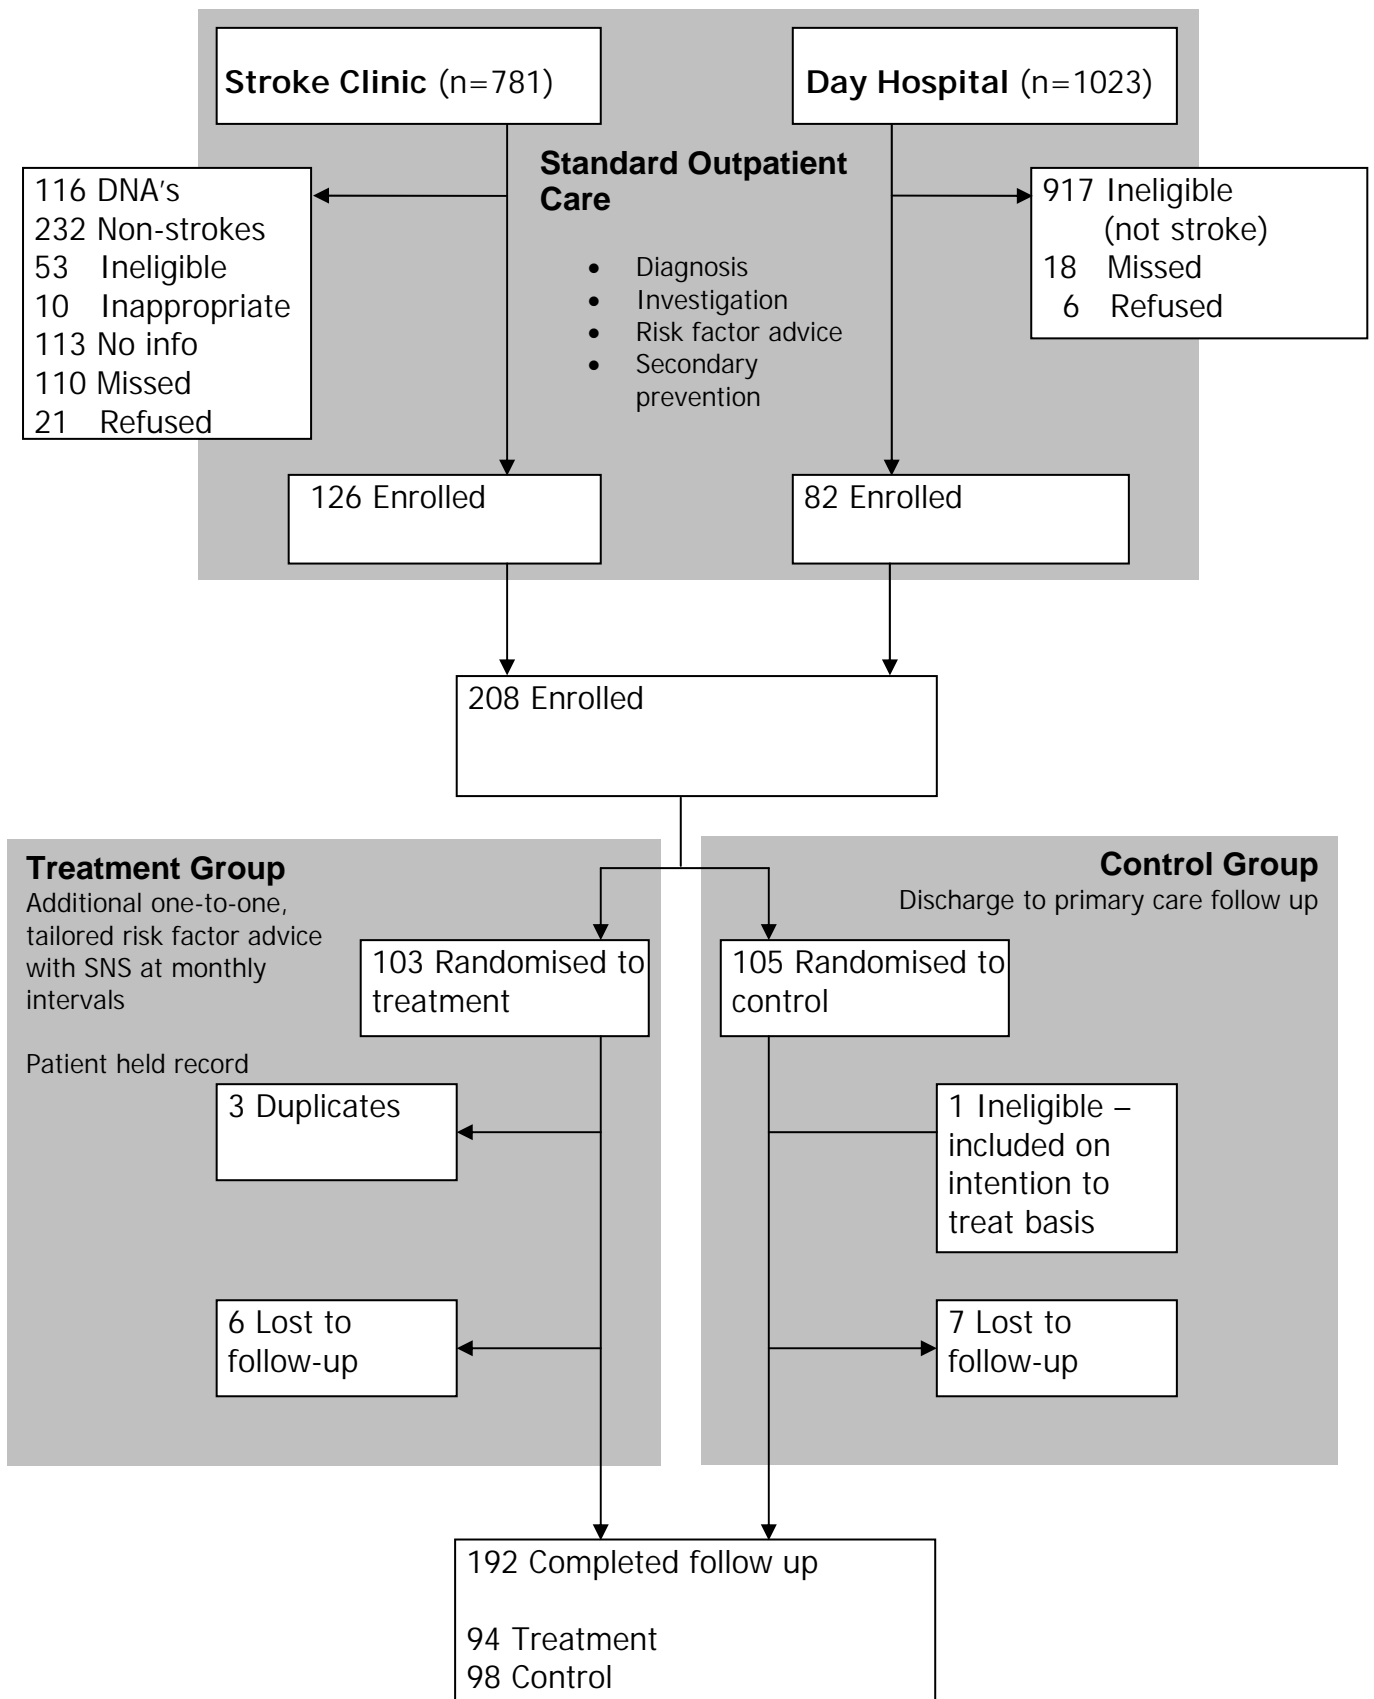

Supplement: afi075_Supplementary_Data.zip [file afi075_Supplementary_Data.zip › afi075supplapp1.pdf]
